# Supplementary material for: CA9-Related Acidic Microenvironment Mediates CD8+ T Cell Related Immunosuppression in Pancreatic Cancer
Source: Front Oncol. 2022 Jan 27;11:832315. doi: 10.3389/fonc.2021.832315 (PMC8828571; doi:10.3389/fonc.2021.832315)
Supplement: Supplementary file 5 [file Table_2.xlsx]

## Sheet: 工作表1
Gene	Log Ratio	p-Value	q-Value	Higher expression in
CA9	4.18	2.85e-34	4.12e-30	(A) High CA9
TFF1	2.2	1.613e-05	0.0003948	(A) High CA9
ANXA10	2.14	1.15e-05	0.0003271	(A) High CA9
CLDN18	2.14	0.0002071	0.002173	(A) High CA9
NR1I2	1.87	1.075e-06	8.33e-05	(A) High CA9
IGF1	-1.85	7.13e-08	2.071e-05	(B) Low CA9
FABP4	-1.83	7.098e-06	0.0002408	(B) Low CA9
VSIG1	1.81	4.023e-05	0.0007205	(A) High CA9
CEL	-1.81	0.0262	0.0755	(B) Low CA9
IHH	1.8	4.967e-06	0.0001941	(A) High CA9
CHRDL1	-1.75	7.9e-07	7.168e-05	(B) Low CA9
SELE	-1.74	8.03e-07	7.239e-05	(B) Low CA9
ACKR1	-1.71	1.858e-06	0.0001102	(B) Low CA9
AKR1B10	1.71	1.501e-05	0.0003771	(A) High CA9
CILP	-1.7	5.18e-07	5.913e-05	(B) Low CA9
NTSR1	1.69	0.0001843	0.002021	(A) High CA9
MSLN	1.68	2.219e-05	0.0004978	(A) High CA9
PLIN1	-1.65	0.0002413	0.002416	(B) Low CA9
ARL14	1.64	3.33e-10	4.81e-07	(A) High CA9
COL17A1	1.64	1.285e-05	0.0003431	(A) High CA9
RELN	-1.61	1.327e-05	0.0003498	(B) Low CA9
PLA2G2A	-1.61	0.002837	0.0146	(B) Low CA9
EGLN3	1.6	2.88e-13	1.39e-09	(A) High CA9
ALDH3A1	1.59	2.474e-06	0.0001283	(A) High CA9
C7	-1.57	1.483e-06	9.895e-05	(B) Low CA9
CTRL	-1.57	0.0115	0.041	(B) Low CA9
PITX1	1.55	4.67e-07	5.597e-05	(A) High CA9
VIPR2	-1.55	7.374e-06	0.0002463	(B) Low CA9
MADCAM1	-1.55	3.4e-05	0.0006416	(B) Low CA9
SULT1C2	1.55	6.618e-05	0.001006	(A) High CA9
PLIN4	-1.52	7.177e-05	0.001063	(B) Low CA9
NPC1L1	1.5	3.978e-06	0.0001689	(A) High CA9
CLIC3	1.49	3.239e-06	0.0001506	(A) High CA9
C6ORF223	1.48	2.65e-08	1.033e-05	(A) High CA9
AOX1	-1.48	3.77e-07	4.808e-05	(B) Low CA9
FCN1	-1.47	2.777e-05	0.0005652	(B) Low CA9
CXCL12	-1.46	6.91e-10	7.66e-07	(B) Low CA9
ABCA8	-1.45	1.992e-06	0.0001136	(B) Low CA9
PADI1	1.45	0.00316	0.0157	(A) High CA9
SELP	-1.44	1.71e-07	2.928e-05	(B) Low CA9
FOSB	-1.44	8.955e-06	0.0002807	(B) Low CA9
SDR16C5	1.43	3.07e-06	0.0001466	(A) High CA9
NGFR	-1.42	9.95e-07	8.128e-05	(B) Low CA9
KCNJ5	-1.42	3.345e-06	0.0001536	(B) Low CA9
C16ORF89	-1.41	1.263e-05	0.0003421	(B) Low CA9
FREM1	-1.4	6.49e-07	6.476e-05	(B) Low CA9
OSR1	-1.39	4.14e-08	1.502e-05	(B) Low CA9
GZMK	-1.39	3.111e-06	0.0001468	(B) Low CA9
TFF3	1.37	0.0008112	0.00577	(A) High CA9
SFRP1	-1.36	4.317e-05	0.0007517	(B) Low CA9
AKR7A3	1.34	6.4e-07	6.476e-05	(A) High CA9
MYEOV	1.34	1.557e-06	0.0001002	(A) High CA9
GCKR	1.34	4.624e-06	0.0001842	(A) High CA9
CAPN8	1.33	2.728e-06	0.0001375	(A) High CA9
SULT1B1	1.33	0.0002272	0.00232	(A) High CA9
MYO1A	1.33	0.001032	0.006893	(A) High CA9
GALNT16	-1.32	4.5e-07	5.452e-05	(B) Low CA9
PDE4C	1.32	9.12e-07	7.826e-05	(A) High CA9
TRIM15	1.32	1.279e-06	9.221e-05	(A) High CA9
BAIAP2L2	1.3	9.93e-07	8.128e-05	(A) High CA9
VSIG2	1.29	7.613e-06	0.00025	(A) High CA9
CEACAM5	1.29	0.008727	0.0333	(A) High CA9
ITPKA	1.28	5.05e-07	5.877e-05	(A) High CA9
AOC1	1.28	2.461e-06	0.0001283	(A) High CA9
S100P	1.28	0.000285	0.002738	(A) High CA9
BEX1	-1.28	0.001396	0.008578	(B) Low CA9
IGSF9	1.27	5.81e-09	3.643e-06	(A) High CA9
S100A14	1.27	6.66e-08	2.043e-05	(A) High CA9
DPT	-1.27	3.573e-06	0.0001571	(B) Low CA9
CUZD1	-1.27	0.0236	0.07	(B) Low CA9
MEDAG	-1.26	6.483e-06	0.0002261	(B) Low CA9
CLEC10A	-1.26	1.763e-05	0.000419	(B) Low CA9
TRIM29	1.26	0.0001804	0.001989	(A) High CA9
UNC79	-1.26	0.0002071	0.002173	(B) Low CA9
ANGPTL1	-1.25	4.989e-06	0.0001944	(B) Low CA9
SMIM24	1.25	9.878e-06	0.0002979	(A) High CA9
PLA2G10	1.25	1.684e-05	0.0004063	(A) High CA9
CD3G	-1.24	2.609e-06	0.0001321	(B) Low CA9
CR1	-1.24	8.081e-05	0.001146	(B) Low CA9
FA2H	1.23	2.65e-08	1.033e-05	(A) High CA9
CARMIL2	-1.23	1.651e-06	0.0001035	(B) Low CA9
AFAP1-AS1	1.22	0.0008328	0.005878	(A) High CA9
FAM83A	1.22	0.002839	0.0146	(A) High CA9
ANO7	1.21	9.77e-08	2.308e-05	(A) High CA9
CRYBG2	1.21	1.435e-06	9.715e-05	(A) High CA9
C6	-1.21	0.006831	0.0277	(B) Low CA9
SLC6A8	1.2	1.34e-11	3.65e-08	(A) High CA9
FCMR	-1.2	4.251e-06	0.0001736	(B) Low CA9
P2RY10	-1.2	3.837e-05	0.0006968	(B) Low CA9
FER1L4	1.2	0.0002987	0.002845	(A) High CA9
IL6	-1.2	0.0004945	0.004049	(B) Low CA9
NRCAM	-1.19	7.7e-07	7.094e-05	(B) Low CA9
GPR171	-1.19	6.286e-06	0.0002227	(B) Low CA9
CHL1	-1.19	9.344e-06	0.0002885	(B) Low CA9
CNR1	-1.19	3.269e-05	0.0006267	(B) Low CA9
ATP10B	1.19	0.0003684	0.003289	(A) High CA9
KLK10	1.19	0.0008636	0.006033	(A) High CA9
TRIM7	1.18	1.46e-07	2.755e-05	(A) High CA9
GNG4	-1.18	4.366e-06	0.0001773	(B) Low CA9
NTRK2	-1.18	7.019e-06	0.0002397	(B) Low CA9
MMRN1	-1.18	3.367e-05	0.0006378	(B) Low CA9
C4BPB	1.18	0.0002397	0.002403	(A) High CA9
PTK6	1.17	1.19e-07	2.487e-05	(A) High CA9
CFP	-1.17	1.04e-06	8.225e-05	(B) Low CA9
CKMT1A	1.17	3.319e-06	0.0001529	(A) High CA9
PLAC8	1.17	7.87e-06	0.0002561	(A) High CA9
CYP3A5	1.17	0.0001115	0.001423	(A) High CA9
FAM107A	-1.16	2.17e-07	3.364e-05	(B) Low CA9
CA12	1.16	8.87e-07	7.749e-05	(A) High CA9
WDFY4	-1.16	1.268e-05	0.0003421	(B) Low CA9
PRKCB	-1.16	2.31e-05	0.0005061	(B) Low CA9
SIT1	-1.16	3.353e-05	0.0006369	(B) Low CA9
GATA4	1.16	0.0001467	0.001724	(A) High CA9
NRXN1	-1.16	0.0008978	0.006196	(B) Low CA9
ABCA9	-1.15	1.51e-06	9.896e-05	(B) Low CA9
IL1R2	1.15	1.146e-05	0.0003271	(A) High CA9
DNAH2	1.15	1.28e-05	0.0003424	(A) High CA9
RSPO3	-1.15	4.5e-05	0.0007714	(B) Low CA9
KCNK3	-1.15	0.0002734	0.002652	(B) Low CA9
CXCR5	-1.15	0.002489	0.0132	(B) Low CA9
KLRG1	-1.14	1.28e-08	7.123e-06	(B) Low CA9
FAM83E	1.14	2.84e-07	4.051e-05	(A) High CA9
CD8B	-1.14	5.55e-07	6.014e-05	(B) Low CA9
KL	-1.14	1.126e-06	8.485e-05	(B) Low CA9
RNF183	1.14	1.545e-05	0.0003854	(A) High CA9
ATP1A2	-1.14	0.0004323	0.003681	(B) Low CA9
CD8A	-1.13	1.245e-06	9.065e-05	(B) Low CA9
TSPAN1	1.13	2.737e-06	0.0001375	(A) High CA9
AOAH	-1.13	2.949e-06	0.0001429	(B) Low CA9
TMPRSS4	1.13	5.139e-06	0.0001976	(A) High CA9
TNFSF8	-1.13	1.099e-05	0.0003208	(B) Low CA9
CKMT1B	1.12	1.47e-07	2.755e-05	(A) High CA9
ADAM23	-1.12	2.276e-06	0.0001229	(B) Low CA9
POU2F3	1.12	1.779e-05	0.0004219	(A) High CA9
CD36	-1.12	4.036e-05	0.0007216	(B) Low CA9
PTPRZ1	-1.12	0.0002136	0.002223	(B) Low CA9
HOXB9	1.12	0.006335	0.0263	(A) High CA9
SDCBP2	1.11	1.85e-10	3.8e-07	(A) High CA9
ADAMTSL5	1.11	1.65e-09	1.321e-06	(A) High CA9
ADM	1.11	1.75e-07	2.928e-05	(A) High CA9
B3GNT4	1.11	1.334e-06	9.295e-05	(A) High CA9
IRX5	1.11	1.415e-05	0.0003638	(A) High CA9
HS6ST2	-1.11	3.848e-05	0.0006979	(B) Low CA9
CCR2	-1.1	4.606e-06	0.000184	(B) Low CA9
CD163	-1.1	7.151e-06	0.0002415	(B) Low CA9
CCN5	-1.1	0.0001217	0.001512	(B) Low CA9
GPX2	1.1	0.0002206	0.002272	(A) High CA9
CD79B	-1.1	0.0005888	0.004591	(B) Low CA9
CCL21	-1.1	0.005077	0.0224	(B) Low CA9
PLEK2	1.09	3.34e-10	4.81e-07	(A) High CA9
MST1R	1.09	1.82e-09	1.383e-06	(A) High CA9
PACSIN1	-1.09	4.113e-06	0.0001704	(B) Low CA9
BMPER	-1.09	1.443e-05	0.0003668	(B) Low CA9
POU5F1	1.09	3.746e-05	0.0006854	(A) High CA9
PLAAT5	-1.09	5.13e-05	0.0008453	(B) Low CA9
ABHD11-AS1	1.09	5.222e-05	0.0008576	(A) High CA9
LMO3	-1.09	5.988e-05	0.0009398	(B) Low CA9
ADAMTS8	-1.09	0.0006079	0.00469	(B) Low CA9
MUC13	1.09	0.0006813	0.0051	(A) High CA9
HP	-1.09	0.003009	0.0152	(B) Low CA9
TMEM92	1.08	1.73e-08	7.607e-06	(A) High CA9
LRRC2	-1.08	1.838e-06	0.0001102	(B) Low CA9
CYP1B1	-1.08	6.256e-06	0.0002222	(B) Low CA9
GAPT	-1.08	2.591e-05	0.000543	(B) Low CA9
SERPINB5	1.08	7.485e-05	0.001097	(A) High CA9
SSTR1	1.08	0.0001188	0.001485	(A) High CA9
CD22	-1.08	0.0008051	0.005745	(B) Low CA9
GSDMB	1.07	1.42e-08	7.316e-06	(A) High CA9
HKDC1	1.07	1.2e-07	2.487e-05	(A) High CA9
MPEG1	-1.07	9.91e-07	8.128e-05	(B) Low CA9
TNXB	-1.07	1.234e-06	9.031e-05	(B) Low CA9
ANK2	-1.07	4.139e-06	0.0001705	(B) Low CA9
PTPRR	1.07	6.239e-06	0.0002222	(A) High CA9
XKR9	1.07	1.185e-05	0.000332	(A) High CA9
COL14A1	-1.07	1.323e-05	0.0003498	(B) Low CA9
AGR2	1.07	1.47e-05	0.0003725	(A) High CA9
ST6GALNAC1	1.07	5.954e-05	0.0009382	(A) High CA9
SV2B	-1.07	0.0001417	0.001683	(B) Low CA9
CD79A	-1.07	0.006295	0.0262	(B) Low CA9
S100A5	1.06	1.05e-06	8.225e-05	(A) High CA9
CXCR6	-1.06	1.847e-06	0.0001102	(B) Low CA9
PEG10	-1.06	1.922e-06	0.0001126	(B) Low CA9
MUC1	1.06	3.312e-06	0.0001529	(A) High CA9
GZMM	-1.06	3.407e-05	0.0006421	(B) Low CA9
CHIT1	-1.06	0.0184	0.0579	(B) Low CA9
MIR9-3HG	-1.05	1.303e-06	9.251e-05	(B) Low CA9
VILL	1.05	1.591e-06	0.0001015	(A) High CA9
SFN	1.05	2.524e-06	0.0001298	(A) High CA9
IKZF1	-1.05	5.719e-06	0.0002104	(B) Low CA9
ZNF385D	-1.05	7.168e-05	0.001063	(B) Low CA9
MYRIP	-1.05	0.0001389	0.001663	(B) Low CA9
PAK3	-1.05	0.0007497	0.005459	(B) Low CA9
INA	-1.05	0.001443	0.008794	(B) Low CA9
LHFPL4	-1.05	0.005542	0.0238	(B) Low CA9
ERP27	-1.05	0.0109	0.0395	(B) Low CA9
ARHGEF39	1.04	1.52e-11	3.65e-08	(A) High CA9
HSD11B1	-1.04	5.24e-08	1.759e-05	(B) Low CA9
BIK	1.04	6.46e-07	6.476e-05	(A) High CA9
GPR35	1.04	2.308e-06	0.0001237	(A) High CA9
AKR7L	1.04	3.849e-06	0.0001656	(A) High CA9
CD48	-1.04	1.999e-05	0.0004627	(B) Low CA9
SLAMF1	-1.04	3.24e-05	0.0006254	(B) Low CA9
LYVE1	-1.04	3.562e-05	0.0006653	(B) Low CA9
RIPOR2	-1.04	6.936e-05	0.001032	(B) Low CA9
LRRC66	1.04	0.0001583	0.001808	(A) High CA9
SLC6A17	-1.04	0.001923	0.0109	(B) Low CA9
ABHD17C	1.03	4.04e-10	4.85e-07	(A) High CA9
APLNR	-1.03	5.17e-08	1.759e-05	(B) Low CA9
IL33	-1.03	1.004e-05	0.0003003	(B) Low CA9
ZAP70	-1.03	4.661e-05	0.0007869	(B) Low CA9
CST1	1.03	0.008209	0.0317	(A) High CA9
AIF1L	-1.02	9.45e-10	9.73e-07	(B) Low CA9
CMKLR1	-1.02	2.83e-07	4.051e-05	(B) Low CA9
HYAL1	1.02	1.855e-06	0.0001102	(A) High CA9
NLGN4X	-1.02	6.027e-06	0.0002189	(B) Low CA9
KLF15	-1.02	1.291e-05	0.0003441	(B) Low CA9
RNF39	1.02	3.082e-05	0.0006005	(A) High CA9
LIME1	1.02	3.164e-05	0.0006123	(A) High CA9
BCAS1	1.02	5.963e-05	0.0009386	(A) High CA9
RASGRP2	-1.02	0.0002022	0.002147	(B) Low CA9
NR4A3	-1.02	0.0002636	0.002592	(B) Low CA9
SLIT1	-1.02	0.0003635	0.003265	(B) Low CA9
ESPN	1.02	0.001047	0.006943	(A) High CA9
TRIM54	1.02	0.004048	0.0188	(A) High CA9
VTN	-1.02	0.004836	0.0216	(B) Low CA9
PCSK1	-1.02	0.008083	0.0314	(B) Low CA9
DMBT1	1.02	0.0264	0.0759	(A) High CA9
CYP1B1-AS1	-1.01	9.05e-09	5.436e-06	(B) Low CA9
MLPH	1.01	1.99e-08	8.216e-06	(A) High CA9
IQGAP3	1.01	4.14e-07	5.1e-05	(A) High CA9
GIMAP7	-1.01	9.64e-07	8.128e-05	(B) Low CA9
P2RY8	-1.01	2.054e-06	0.0001156	(B) Low CA9
PLEKHN1	1.01	5.193e-06	0.0001991	(A) High CA9
RAPGEFL1	1.01	1.099e-05	0.0003208	(A) High CA9
ABCA6	-1.01	1.265e-05	0.0003421	(B) Low CA9
KLRK1	-1.01	1.271e-05	0.0003421	(B) Low CA9
CD96	-1.01	1.334e-05	0.0003505	(B) Low CA9
SLIT3	-1.01	1.436e-05	0.0003665	(B) Low CA9
FOXL1	1.01	2.682e-05	0.0005539	(A) High CA9
ZNF488	1.01	4.154e-05	0.0007336	(A) High CA9
MAP4K1	-1.01	5.048e-05	0.0008347	(B) Low CA9
RYR1	-1.01	6.772e-05	0.001018	(B) Low CA9
NAPSB	-1.01	7.872e-05	0.001129	(B) Low CA9
TMEM150B	1.01	0.000926	0.006339	(A) High CA9
PLCXD3	-1.01	0.001152	0.007427	(B) Low CA9
KIF1A	-1.01	0.005936	0.025	(B) Low CA9
RASAL1	1	3.06e-07	4.326e-05	(A) High CA9
STAT4	-1	6.58e-07	6.476e-05	(B) Low CA9
FAM110D	-1	7.74e-07	7.094e-05	(B) Low CA9
CCR5	-1	3.453e-06	0.0001551	(B) Low CA9
LRRC10B	-1	8.067e-06	0.0002602	(B) Low CA9
BABAM2-AS1	-1	9.736e-06	0.0002955	(B) Low CA9
CCL2	-1	1.043e-05	0.0003093	(B) Low CA9
BCHE	-1	1.227e-05	0.0003364	(B) Low CA9
TMEM255A	-1	3.906e-05	0.0007048	(B) Low CA9
STAG3	-1	6.293e-05	0.0009758	(B) Low CA9
